# Supplementary material for: Family conferences in the approach to dependent patients with high clinical complexity: from family health teams to palliative care
Source: Research Square preprint supplement (doi:10.21203/rs.3.rs-7266017/v1), 2025-10-08
Supplement: Supplementary file 1 [file b962f5ccbd48cfea9cb90a7a.docx]

**Annex 1**

**FAMILY CONFERENCES IN THE APPROACH TO DEPENDENT PATIENTS WITH HIGH CLINICAL COMPLEXITY: FROM FAMILY HEALTH TEAMS TO PALLIATIVE CARE**

This questionnaire, which takes about 5 minutes to complete, aims to explore the importance of family conferences and understand their effectiveness.

Completing the questionnaire is voluntary and anonymous, with privacy and data protection guaranteed. Only researchers will have access to the data, which will be used exclusively for this study. There is no expectation that you will incur any expense or risk by answering the questionnaire. There are no remunerations or benefits.

**Caregiver:**

Sex: Female Male

Age _________ Education ______________

Kinship ___________________________

**Patient:**

Sex: Female Male

Age _________ Education ______________

Comorbidities _______________ Diagnosis_________________

Dependence grade _______________________

Complexity grade _______________________

Professionals present in the family conference: Médico Enfermeiro

Psicólogo Assistente social

1. **Patient and Family Satisfaction (overall assessment of satisfaction, knowledge, attitudes/consideration of the family's opinions explained in the Individual Care Plan and the team's commitment to it)**

Totally disagree Totally agree

| **1** | **2** | **3** | **4** | **5** | **6** | **7** | **8** | **9** | **10** |
| --- | --- | --- | --- | --- | --- | --- | --- | --- | --- |
|  |  |  |  |  |  |  |  |  |  |

1. **There was an improvement in dealing with the situation?**

Totally disagree Totally agree

| **1** | **2** | **3** | **4** | **5** | **6** | **7** | **8** | **9** | **10** |
| --- | --- | --- | --- | --- | --- | --- | --- | --- | --- |
|  |  |  |  |  |  |  |  |  |  |

1. **There has been an increase in collaboration and delivery of care?**

Totally disagree Totally agree

| **1** | **2** | **3** | **4** | **5** | **6** | **7** | **8** | **9** | **10** |
| --- | --- | --- | --- | --- | --- | --- | --- | --- | --- |
|  |  |  |  |  |  |  |  |  |  |

1. **In your opinion, was the family conference effective in resolving the problems identified during it?**

Totally disagree Totally agree

| **1** | **2** | **3** | **4** | **5** | **6** | **7** | **8** | **9** | **10** |
| --- | --- | --- | --- | --- | --- | --- | --- | --- | --- |
|  |  |  |  |  |  |  |  |  |  |

1. **The strategies discussed were successfully implemented?**

Totally disagree Totally agree

| **1** | **2** | **3** | **4** | **5** | **6** | **7** | **8** | **9** | **10** |
| --- | --- | --- | --- | --- | --- | --- | --- | --- | --- |
|  |  |  |  |  |  |  |  |  |  |

1. **There was a reduction in hospitalizations and visits to the emergency room after the family conference?**

Number of visits to the hospital in the month prior to CF? __________

Number of visits to the hospital in the month following CF? __________

1. **There was an improvement in the clarity and understanding of the information?**

Totally disagree Totally agree

| **1** | **2** | **3** | **4** | **5** | **6** | **7** | **8** | **9** | **10** |
| --- | --- | --- | --- | --- | --- | --- | --- | --- | --- |
|  |  |  |  |  |  |  |  |  |  |

1. **Formal caregiver Caregiver present in the FC**
2. **Family conferencing facilitated teamwork and care coordination?**

Totally disagree Totally agree

| **1** | **2** | **3** | **4** | **5** | **6** | **7** | **8** | **9** | **10** |
| --- | --- | --- | --- | --- | --- | --- | --- | --- | --- |
|  |  |  |  |  |  |  |  |  |  |

1. **Any topic or clarification that was left unaddressed in the CF?**

**__________________________________________________________________________________________________________________________________________________________________________________________________________________________________________________________________________________________________________________________________________________________________________________________________________________________________________________________________________________________________________**
